# Supplementary material for: Aquaporin 1, Aquaporin 8, and Aquaporin 9 Expressions in Malignant Melanoma: A Possible Correlation with Prognosis and Clinical Outcome
Source: MDPI journal article supplement (doi:10.3390/jcm12227137), 2023-11-16
Supplement: s1 [file s1]

## Supplementary materials

### Supplementary Figure S1.

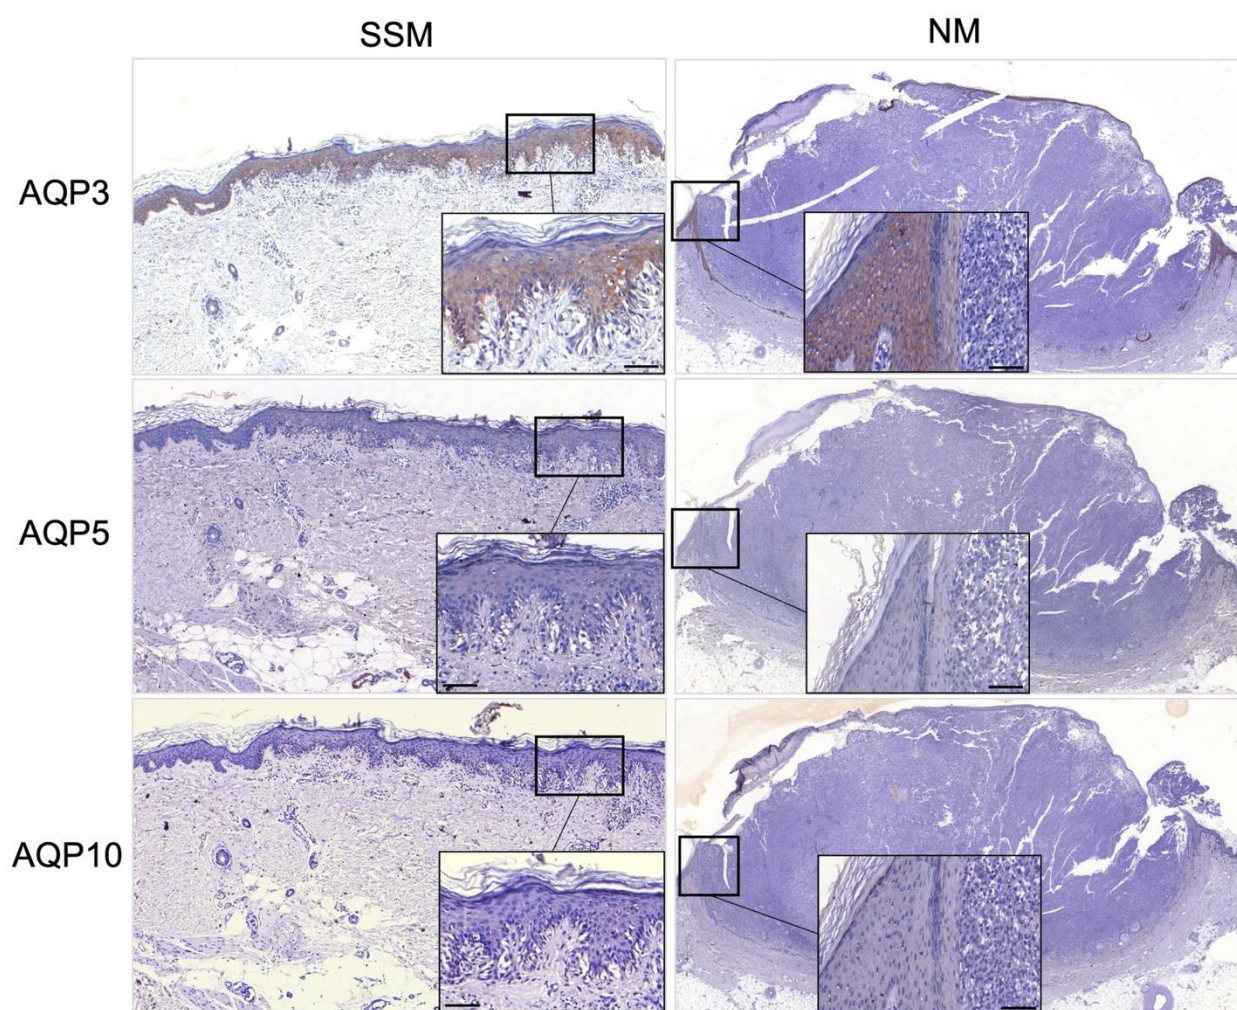

**Figure S1: Immunohistochemical stain of AQP3, 5 and 10 on primary melanomas.**

Representative IHC pictures of SSM and NM stained for AQP3, 5 and 10. Scale bar: 50  $\mu$ m. SSM, superficial spreading melanoma; NM, nodular melanoma; AQP, aquaporin.
